# Supplementary material
Source: PubMed Central journal article supplement (PMC2722039)
Supplement: NIHMS120285-supplement-01.pdf [file NIHMS120285-supplement-01.pdf]

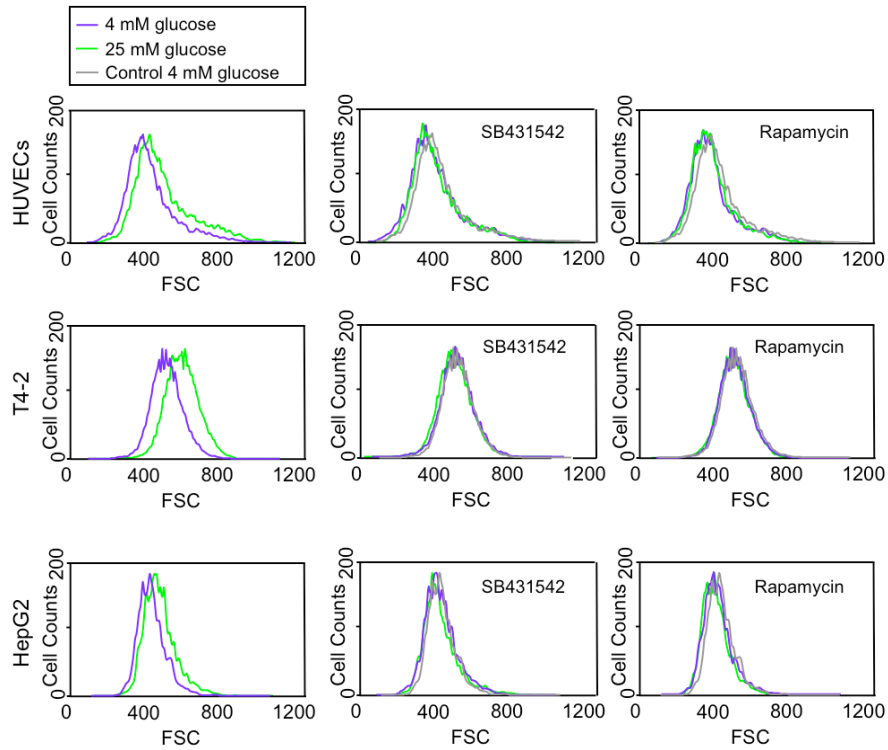

**Supplemental Figure 2. Glucose-induced increase in cell size is inhibited by rapamycin.** Cell size distribution of HUVECs, T4-2 and HepG2 cells, cultured with 4 mM glucose and then shifted or not to 25 mM glucose for 24 h, in the absence or presence of SB431542 or rapamycin, was determined by flow cytometry using FSC as parameter. The grey lines, marked “Control 4 mM glucose”, in the middle and right panels correspond to the 4 mM glucose profile in untreated cells shown in the left panels.

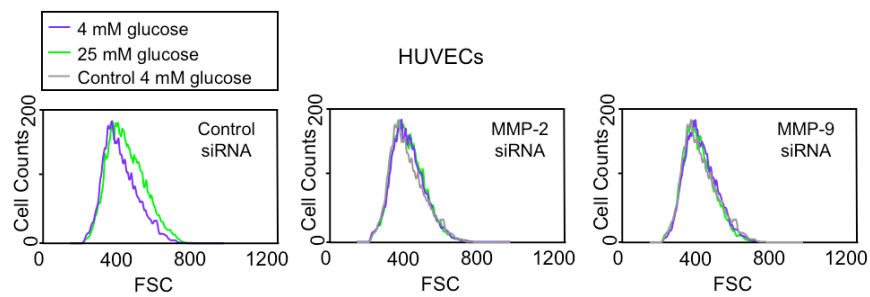

**Supplemental Figure 3. MMP-2 and MMP-9 are essential for glucose-induced increase of cell size.** HUVECs were transfected with MMP-2 siRNA, MMP-9 siRNA or control siRNA. The size distribution of cells cultured with 4mM and then shifted or not to 25mM glucose was determined by flow cytometry using FSC as parameter. The grey lines, marked “Control 4 mM glucose”, in the middle and right panels correspond to the 4 mM glucose profile in cells transfected with control siRNA shown in the left panel.
